# Supplementary material for: Effect of Different Parameters (Treatment Administration Mode, Concentration and Phenological Weed Stage) on Thymbra capitata L. Essential Oil Herbicidal Activity
Source: MDPI journal article supplement (doi:10.3390/agronomy13122938), 2023-11-29
Supplement: s1 [file s1]

Archive with 1 entries (1 files):
- agronomy-2678054-supplementary.pdf
