# Supplementary material for: Effect of Different Parameters (Treatment Administration Mode, Concentration and Phenological Weed Stage) on Thymbra capitata L. Essential Oil Herbicidal Activity
Source: MDPI journal article supplement (doi:10.3390/agronomy13122938), 2023-11-29
Supplement: s1 [file s1 › agronomy-2678054-supplementary.pdf]

**Table S1.** Number of plantlets grown on each tray during the experiment.

| Treatment      | Day            |                |                |                |                |                |
|----------------|----------------|----------------|----------------|----------------|----------------|----------------|
|                | 0              | 1              | 3              | 7              | 10             | 15             |
| WATER CONTROL  | 52.67 ± 2.19 a | 52.67 ± 2.19 a | 53.33 ± 2.85 a | 53.33 ± 2.85 a | 53.67 ± 2.73 a | 54.33 ± 2.6 a  |
| FITOIL CONTROL | 53.33 ± 0.67 a | 52.33 ± 1.45 a | 52.33 ± 1.45 a |
| TC4            | 51.67 ± 3.28 a | 32.67 ± 5.21 b | 29.33 ± 2.67 b | 29 ± 2.52 b    | 29.33 ± 2.73 b | 29.33 ± 2.73 b |
| TC8            | 51.67 ± 2.33 a | 10.33 ± 8.41 c | 10.33 ± 8.41 c | 10.67 ± 8.74 c | 10.67 ± 8.74 c | 11.33 ± 8.95 c |
| TC12           | 50.00 ± 0.58 a | 0.33 ± 0.33 c  | 1.00 ± 0.58 c  | 1.67 ± 1.2 c   | 1.67 ± 1.2 c   | 1.67 ± 1.2 c   |

Values are means of three replicates ± standard error. Different letters in the same column indicate statistical differences between treatments ( $p < 0.05$ ) using Fisher's least significant difference (LSD) test.

**Table S2.** Multifactorial ANOVA analysis for Efficacy including treatment, species, and time as main factors as well as the double interaction effects.**Análisis de Varianza para EFICACIA - Suma de Cuadrados Tipo III**

| Fuente               | Suma de Cuadrados | Gl   | Cuadrado Medio | Razón-F | Valor-P |
|----------------------|-------------------|------|----------------|---------|---------|
| EFFECTOS PRINCIPALES |                   |      |                |         |         |
| A:TRATAMIENTO        | 1,28957E6         | 9    | 143286,        | 204,33  | 0,0000  |
| B:ESPECIE            | 197773,           | 2    | 98886,7        | 141,02  | 0,0000  |
| C:DIA                | 209507,           | 4    | 52376,7        | 74,69   | 0,0000  |
| INTERACCIONES        |                   |      |                |         |         |
| AB                   | 349427,           | 18   | 19412,6        | 27,68   | 0,0000  |
| AC                   | 210627,           | 36   | 5850,74        | 8,34    | 0,0000  |
| BC                   | 38293,3           | 8    | 4786,67        | 6,83    | 0,0000  |
| RESIDUOS             | 997173,           | 1422 | 701,247        |         |         |
| TOTAL (CORREGIDO)    | 3,29237E6         | 1499 |                |         |         |

Todas las razones-F se basan en el cuadrado medio del error residual

**Table S3.** Multifactorial ANOVA analysis for Damage level including treatment, species, and time as main factors as well as the double interaction effects.**Análisis de Varianza para NIVEL DE DAÑO - Suma de Cuadrados Tipo III**

| Fuente               | Suma de Cuadrados | Gl   | Cuadrado Medio | Razón-F | Valor-P |
|----------------------|-------------------|------|----------------|---------|---------|
| EFFECTOS PRINCIPALES |                   |      |                |         |         |
| A:TRATAMIENTO        | 1795,58           | 9    | 199,509        | 413,39  | 0,0000  |
| B:ESPECIE            | 91,2373           | 2    | 45,6187        | 94,52   | 0,0000  |
| C:DIA                | 17,8027           | 4    | 4,45067        | 9,22    | 0,0000  |
| INTERACCIONES        |                   |      |                |         |         |
| AB                   | 151,163           | 18   | 8,39793        | 17,40   | 0,0000  |
| AC                   | 45,704            | 36   | 1,26956        | 2,63    | 0,0000  |
| BC                   | 20,3493           | 8    | 2,54367        | 5,27    | 0,0000  |
| RESIDUOS             | 686,284           | 1422 | 0,482619       |         |         |
| TOTAL (CORREGIDO)    | 2808,12           | 1499 |                |         |         |

Todas las razones-F se basan en el cuadrado medio del error residual

**Table S4.** Multifactorial ANOVA analysis for Efficacy including treatment, species, and time as main factors as well as the double interaction effects.**Análisis de Varianza para EFICACIA - Suma de Cuadrados Tipo III**

| Fuente               | Suma de Cuadrados | Gl  | Cuadrado Medio | Razón-F | Valor-P |
|----------------------|-------------------|-----|----------------|---------|---------|
| EFFECTOS PRINCIPALES |                   |     |                |         |         |
| A:TRATAMIENTO        | 179840,           | 9   | 19982,2        | 28,04   | 0,0000  |
| B:ESPECIE            | 33640,0           | 1   | 33640,0        | 47,20   | 0,0000  |
| C:DIA                | 39540,0           | 4   | 9885,0         | 13,87   | 0,0000  |
| INTERACCIONES        |                   |     |                |         |         |
| AB                   | 44360,0           | 9   | 4928,89        | 6,92    | 0,0000  |
| AC                   | 54060,0           | 36  | 1501,67        | 2,11    | 0,0002  |
| BC                   | 6860,0            | 4   | 1715,0         | 2,41    | 0,0480  |
| RESIDUOS             | 667140,           | 936 | 712,756        |         |         |
| TOTAL (CORREGIDO)    | 1,02544E6         | 999 |                |         |         |

Todas las razones-F se basan en el cuadrado medio del error residual

**Table S5.** Multifactorial ANOVA analysis for Damage level including treatment, species, and time as main factors as well as the double interaction effects.

**Análisis de Varianza para NIVEL DE DAÑO - Suma de Cuadrados Tipo III**

| Fuente                      | Suma de Cuadrados | Gl  | Cuadrado Medio | Razón-F | Valor-P |
|-----------------------------|-------------------|-----|----------------|---------|---------|
| <b>EFFECTOS PRINCIPALES</b> |                   |     |                |         |         |
| A:TRATAMIENTO               | 498,165           | 9   | 55,3517        | 102,10  | 0,0000  |
| B:ESPECIE                   | 39,601            | 1   | 39,601         | 73,05   | 0,0000  |
| C:DÍA                       | 9,72              | 4   | 2,43           | 4,48    | 0,0014  |
| <b>INTERACCIONES</b>        |                   |     |                |         |         |
| AB                          | 63,749            | 9   | 7,08322        | 13,07   | 0,0000  |
| AC                          | 54,74             | 36  | 1,52056        | 2,80    | 0,0000  |
| BC                          | 1,584             | 4   | 0,396          | 0,73    | 0,5712  |
| RESIDUOS                    | 507,416           | 936 | 0,542111       |         |         |
| TOTAL (CORREGIDO)           | 1174,97           | 999 |                |         |         |

Todas las razones-F se basan en el cuadrado medio del error residual

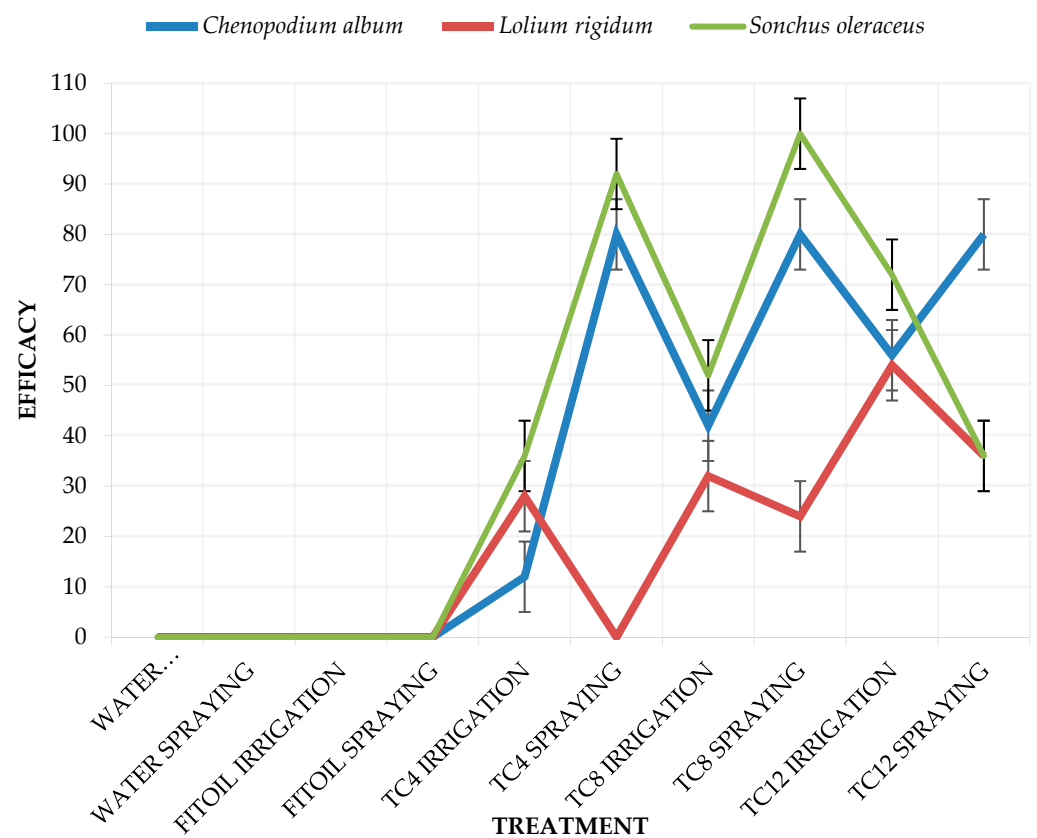

**Figure S1.** Interaction effect of species and treatment for efficacy.

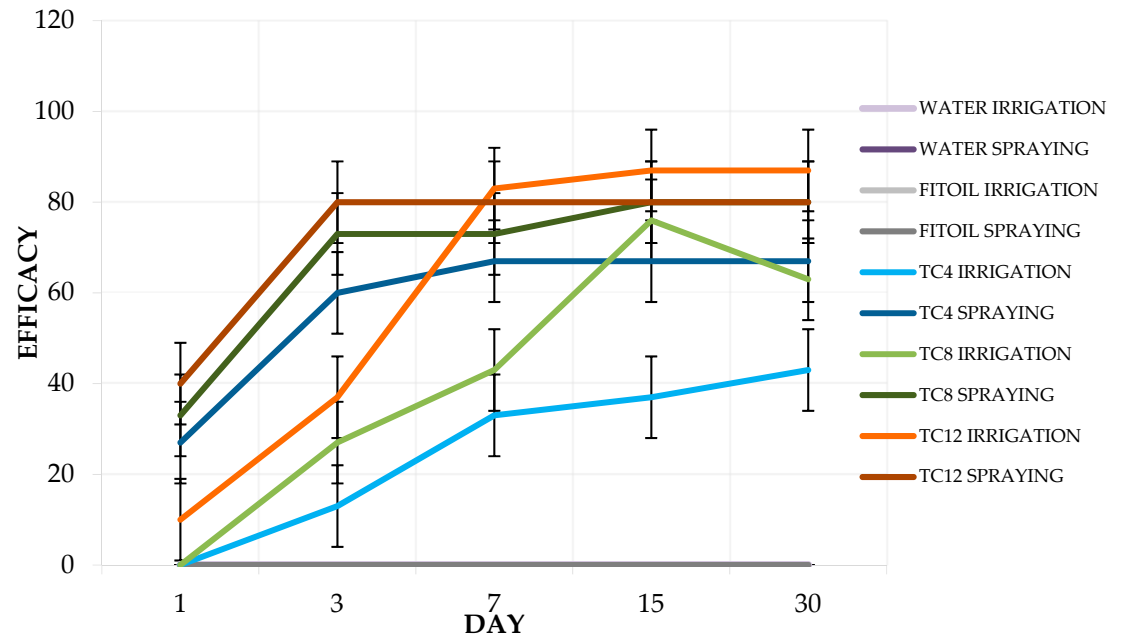

Figure S2. Interaction effect of day and treatment for efficacy.

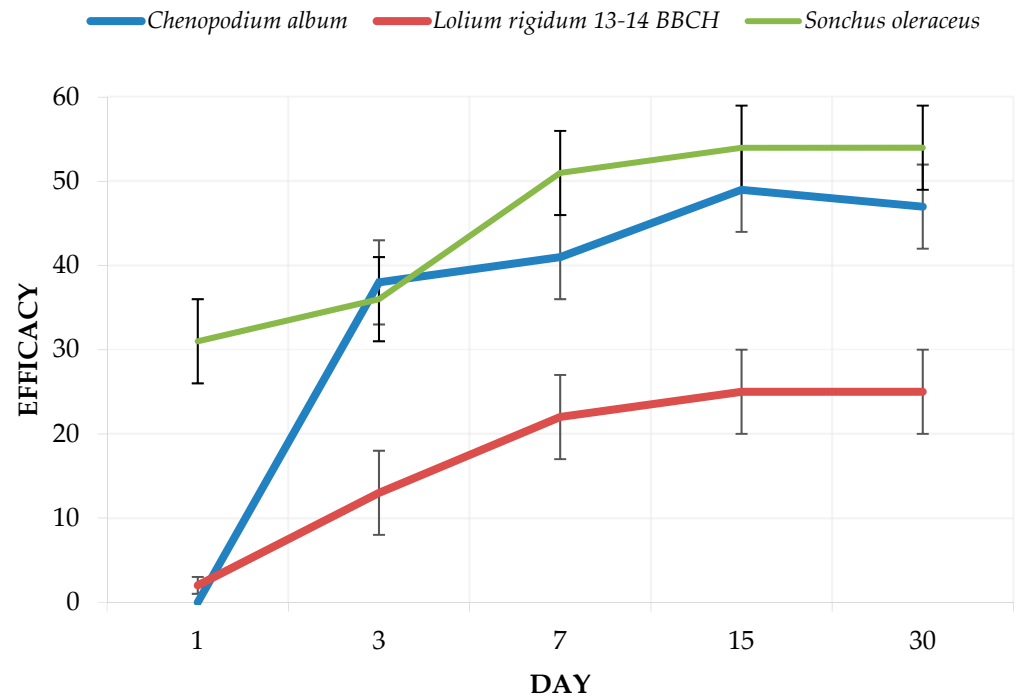

Figure S3. Interaction effect of species and day for efficacy.

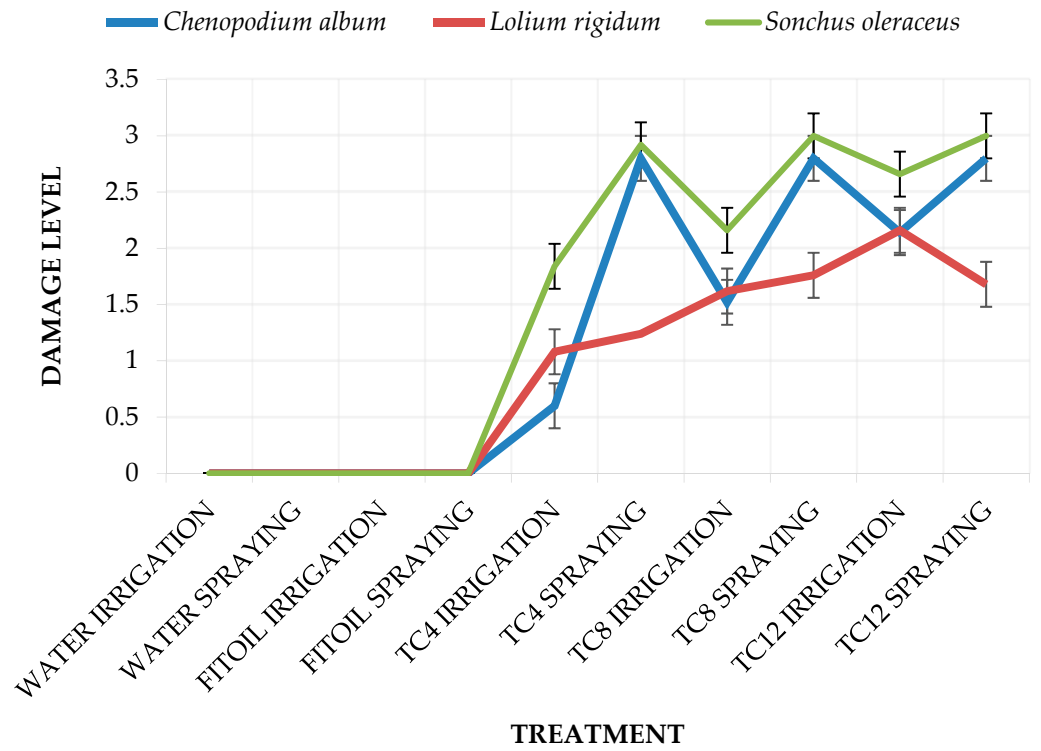

**Figure S4.** Interaction effect of species and treatment for damage level.

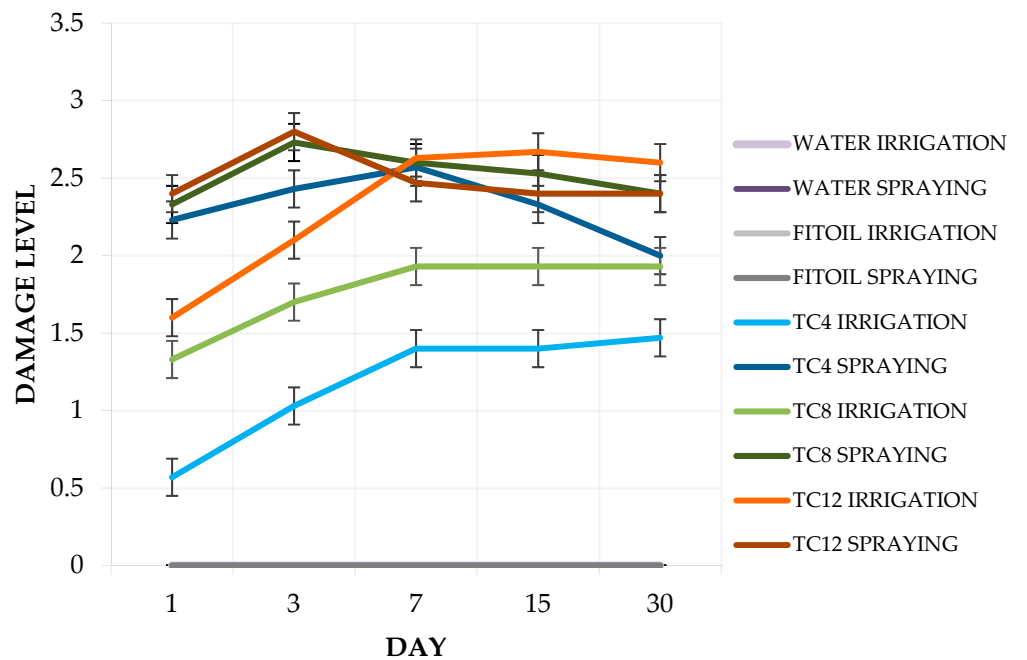

**Figure S5.** Interaction effect of day and treatment for damage level.

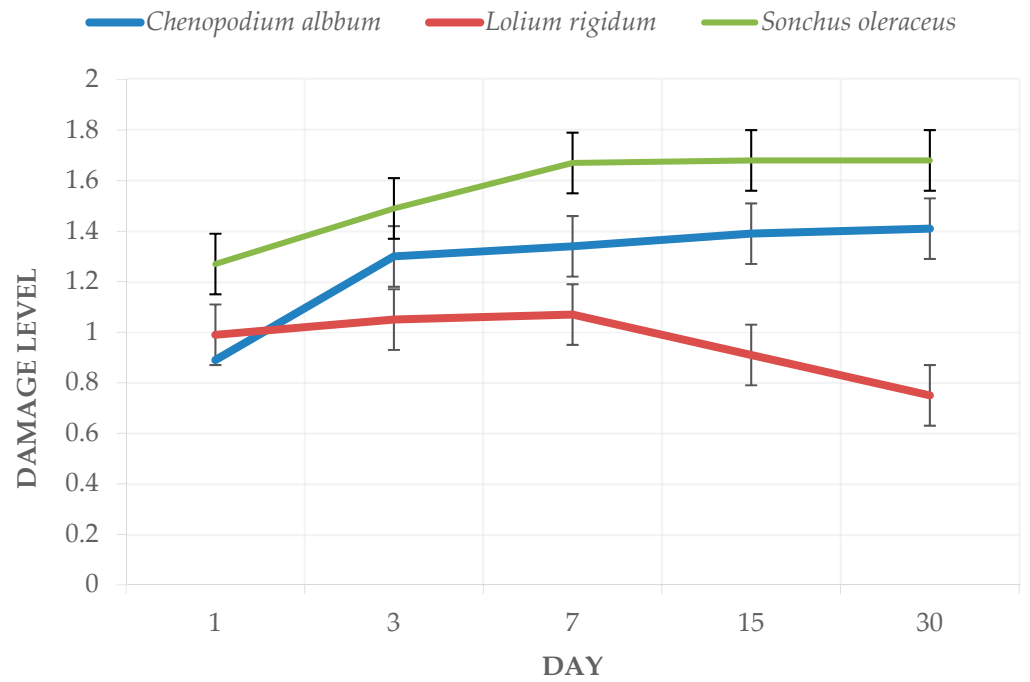

**Figure S6.** Interaction effect of species and day for damage level.

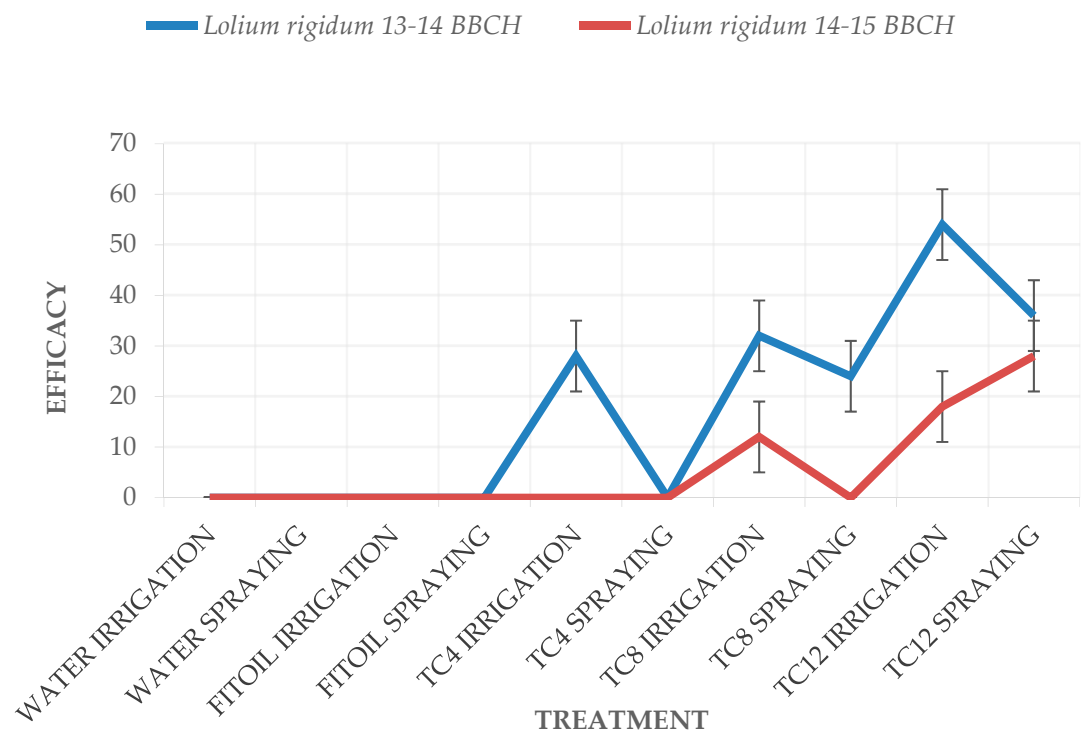

**Figure S7.** Interaction effect of *Lolium rigidum* BBCH stage and treatment for efficacy.

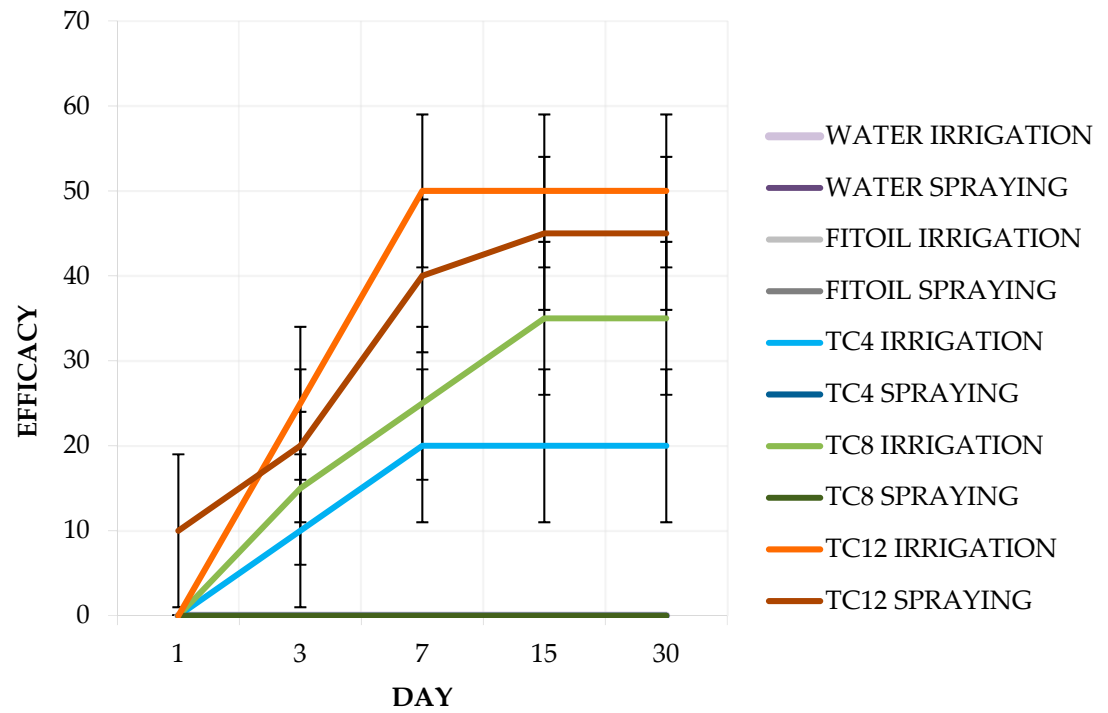

Figure S8. Interaction effect of treatment and day for efficacy.

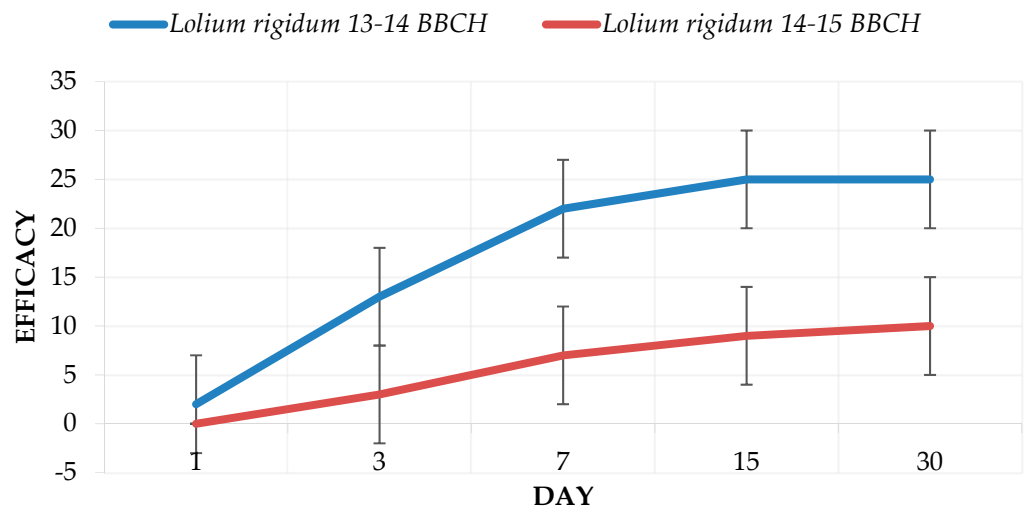

Figure S9. Interaction effect of *Lolium rigidum* BBCH stage and day for efficacy.

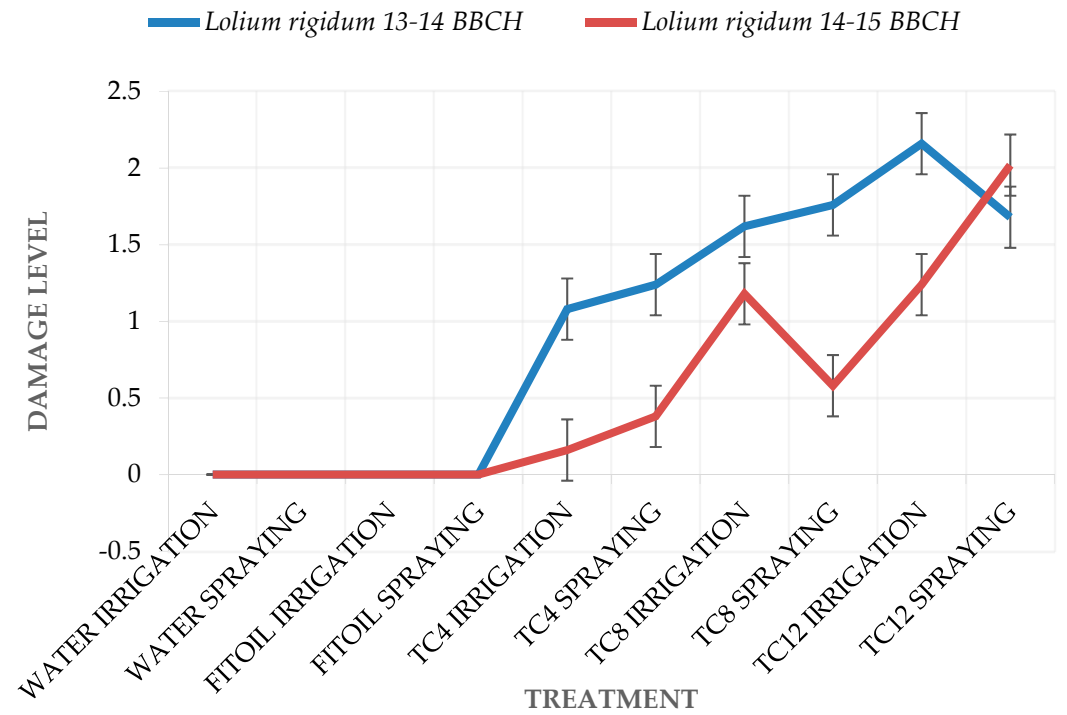

**Figure S10.** Interaction effect of *Lolium rigidum* BBCH stage and treatment for damage level.

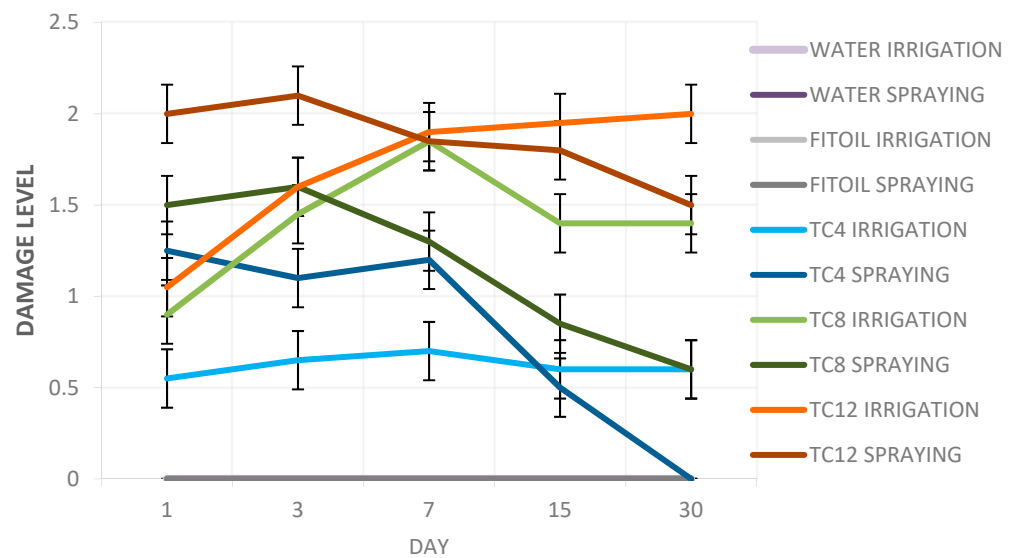

**Figure S11.** Interaction effect of treatment and day for damage level.
